# Supplementary material
Source: PubMed Central journal article supplement (PMC3140432)
Supplement: NIHMS303667-supplement-01.pdf [file NIHMS303667-supplement-01.pdf]

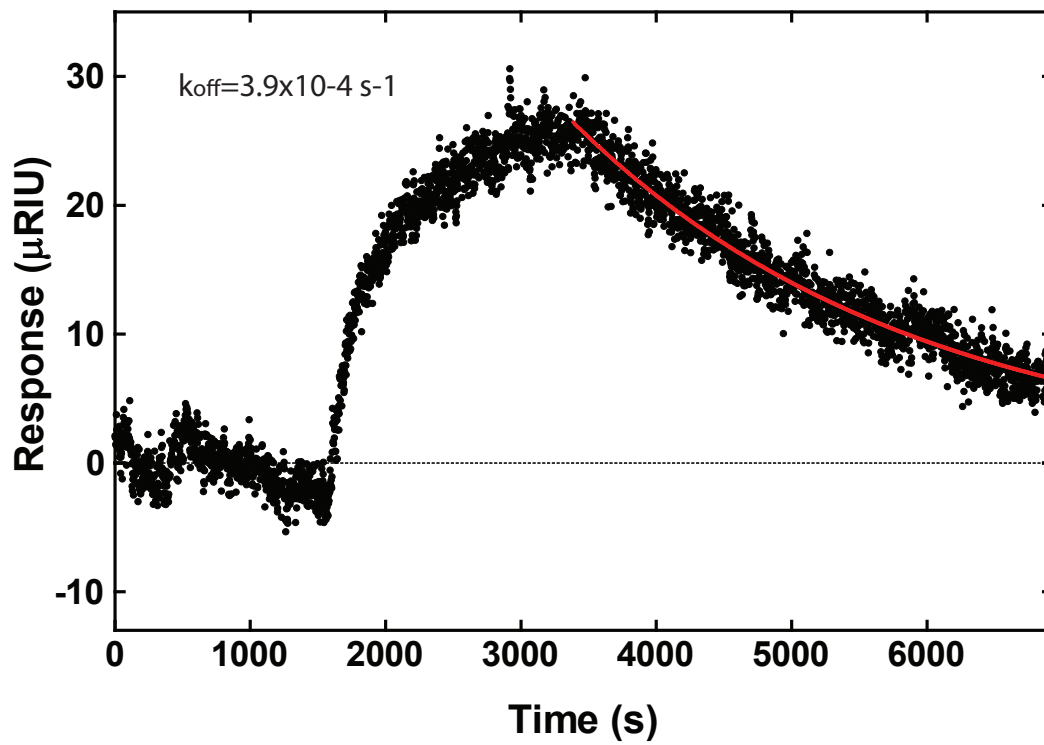

Supplemental Figure 1. Slow binding and dissociation time course for 4 $\mu$ M gallein binding and dissociation. 2000  $\mu$ RIU of G $\beta\gamma$  was immobilized and experiments were performed as described in methods.
